# Supplementary material for: Discrete global grid system-based flow routing datasets in the Amazon and Yukon basins
Source: Copernicus journal article supplement (doi:10.5194/essd-17-2035-2025), 2025-05-13
Supplement: Supplementary file 1 [file essd-17-2035-2025-supplement.zip]

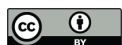

*Supplement of*

## **Discrete global grid system flow routing datasets in the Amazon and Yukon basins**

**Chang Liao et al.**

*Correspondence to:* Chang Liao ([chang.liao@pnnl.gov](mailto:chang.liao@pnnl.gov))

- [essd-17-2035-2025-supplement-title-page.pdf](#)
- [hexwatershed\\_on\\_dggs.mp4](#)

The copyright of individual parts of the supplement might differ from the article licence.
